# Supplementary material for: Phenotypic plasticity underlies local invasion and distant metastasis in colon cancer
Source: eLife. 2021 May 26;10:e61461. doi: 10.7554/eLife.61461 (PMC8192123; doi:10.7554/eLife.61461)
Supplement: Figure 1—source data 1. — The percentage of CD44hi/EpCAMlo subpopulation was determined in a panel of commonly employed colon cancer cell lines by flow cytometric analysis. Please note that, within the same cell line, these percentages can vary depending on the passage number and culture conditions. If indicated by Lindeman et al., consensus molecular subtype classification of the cell lines is shown. [file elife-61461-fig1-data1.xlsx]

## Sheet: Blad1
cell line	% CD44highEpCAMlow	Linnekamp et al.
HCT116 - early culture	5.0 ± 2.5	CMS1
HCT116 - late culture	0.32 ± 0.18
SW480 - early culture	16.7 ± 13
SW480 - late culture	0.34 ± 0.24
RKO	100	CMS1
COLO320-HSR	99.6	CMS4
NCI-H716	66.0 ± 21.21	CMS4
SW620	12.0 ± 4.9	no subtype
CAR-1	0.15 ± 0.07	CMS4
HT29	0.1 ± 0.02	no subtype
T84	0.1	CMS2
COLO205	0.075	no subtype
LS123	0.06 ± 0.03	CMS4
HT55	0.05	CMS2
Hulu805	0.03 ± 0.0	CMS4
DLD1	0.024 ± 0.001
LS174	0.007
HT15	0.003
CACA2	0.003 ± 0.001
SW48	0.002 ± 0.001	CMS1
Oums23	0	CMS4
LOVO	0	CMS1
