# Supplementary material for: Phenotypic plasticity underlies local invasion and distant metastasis in colon cancer
Source: eLife. 2021 May 26;10:e61461. doi: 10.7554/eLife.61461 (PMC8192123; doi:10.7554/eLife.61461)
Supplement: Figure 1—source data 2. — Cells fractions were sorted and plated in culture. After 72 hr, cells were fixed and stained with propidium iodide. Cell cycle distribution was assayed by flow cytometry. Tables demonstrate average and standard deviation of three independent experiments. [file elife-61461-fig1-data2.xlsx]

## Sheet: Blad1
	HCT116	CD44highEpCAMhigh		CD44highEpCAMlow
		mean	SD	mean	SD
	G1	60.5	4.6	72.2	5.1
	S	15.1	2.6	13.2	2.8
	G2-M	23.4	2.6	14.3	2.3
	SW480	CD44highEpCAMhigh		CD44highEpCAMlow
		mean	SD	mean	SD
	G1	55.3	4.6	72.3	7.5
	S	17.1	2.1	15.0	3.0
	G2-M	23.9	2.7	11.6	4.3
