# Supplementary material for: Phenotypic plasticity underlies local invasion and distant metastasis in colon cancer
Source: eLife. 2021 May 26;10:e61461. doi: 10.7554/eLife.61461 (PMC8192123; doi:10.7554/eLife.61461)
Supplement: Figure 1—source data 3. [file elife-61461-fig1-data3.xlsx]

## Sheet: Blad1
	bulk #1	bulk #2	bulk #3	bulk #4	bulk #5	EpCAMhi #1	EpCAMhi #2	EpCAMlo #1	EpCAMlo #2	EpCAMlo #3	EpCAMlo #4	EpCAMlo #5
% EpCAMhi	0.1	1.0	0.0	0.1	0.0	0.0	1.2	1.2	0.2	4.2	1.1	51.9
% EpCAMlo	99.1	95.3	98.8	99.2	99.7	99.6	97.7	91.8	99.4	83.2	96.8	25.3
