# Supplementary material for: Phenotypic plasticity underlies local invasion and distant metastasis in colon cancer
Source: eLife. 2021 May 26;10:e61461. doi: 10.7554/eLife.61461 (PMC8192123; doi:10.7554/eLife.61461)
Supplement: Figure 2—source data 1. — The table encompasses a selection of individual single-cell sorted EpCAMhi and EpCAMlo HCT116 and SW480 clones. Single cells were sorted, grown up, and analyzed at two indicated times points by flow cytometry for their CD44 and EpCAM expression. Percentage of cells present in the set EpCAMhi and EpCAMlo gates is presented in the bar graph. Total success rate of clones grown out of single cells: HCT116 EpCAMhi 15 clones out of 24 sorted cells, HCT116 EpCAMlo: 31/48; SW480 EpCAMhi: 5/36; SW480 EpCAMlo: 11/36. [file elife-61461-fig2-data1.xlsx]

## Sheet: Blad1
HCT116 - EpCAMlow			EpCAMlow	EpCAMhigh		HCT116 - EpCAMhigh			EpCAMlow	EpCAMhigh		SW480 - EpCAMlow			EpCAMlow	EpCAMhigh		SW480 - EpCAMhigh			EpCAMlow	EpCAMhigh
succes rate = 31 clones/48	2F12	18 days	97.2	0		succes rate = 15 clones/48	2A3	18 days	34.8	36.2		succes rate = 5 clones/36	A1	25 days	97.2	0		succes rate = 15 clones/48	A11	28 days	2.7	90.2
		75 days	28.2	46.7				75 days	0.5	97.3				75 days	28.2	46.7				82 days	1.5	92.3
	2 E10	18 days	98.8	0.2			2C1	18 days	0.9	93.4			D5	25 days	98.8	0.2			B12	28 days	0.2	96.1
		72 days	43.3	90.8				72 days	0.3	98.1				75 days	43.3	90.8				82 days	0.2	98.1
	2 E11	18 days	98.8	0			3C8	18 days	4	83.6			F1	25 days	98.8	0			B8	28 days	39	31.8
		72 days	43.4	23				72 days	0.24	98.8				75 days	43.4	23				82 days	26.3	51
	2H11	18 days	98.4	0.02			2F2	18 days	0.01	99.7			H4	28 days	98.4	0.02			E10	28 days	0.2	97.5
		72 days	9.3	84.6				72 days	0.02	99.3				82 days	9.3	84.6				82 days	3.8	91.6
	2D10	20 days	97.9	0.6			2D1	20 days	0.1	97.9			F2	28 days	97.9	0.6			F11	28 days	1	92.6
		72 days	33	47.2				72 days	0.6	96.9				82 days	33	47.2				82 days	2.1	90.8
	2B10	20 days	87	2.4			2H2	20 days	2.2	84.3									F12	28 days	3.2	83.5
		72 days	44.7	42.9				72 days	0.04	99.3										82 days	6.2	83.3
	2B11	20 days	99.4	0.02			2B2	20 days	41.2	26.1									G11	28 days	8.9	71.1
		72 days	57.7	36.2				72 days	6.5	79.1										82 days	35.8	47.8
	2B12	20 days	71.2	6.1			2D2	20 days	0.1	98.7									G8	28 days	2.3	90.2
		72 days	17	66.2				72 days	0.03	99.3										82 days	1.8	93.3
	2F11	20 days	98.8	0			2D3	20 days	8	73.7									H12	28 days		no measurement
		72 days	61.5	25.3				72 days	0.6	97.3										82 days	0.1	98.4
	2G12	20 days	98.7	0.2			2 E2	20 days	23.5	48.3									B7	28 days	0.2	98.3
		72 days	93	4				72 days	0.02	99.3										82 days	0.1	98.6
	2H12	20 days	98.6	0			2G1	20 days	0.5	95.8									E12	28 days	0.1	97.9
		72 days	99.1	0.7				72 days	0.6	94.6										82 days	0.4	97.1
	2A11	20 days	98	0.2			2G2	20 days	3.7	84.2
		72 days	18.3	68.2				72 days	0.9	96.4
							3A8	20 days	8.8	64.5
								72 days	3.2	89.7
							3A9	20 days	37.3	37.6
								72 days	0.1	99.2
							2C3	20 days	0.2	94.7
								72 days	0.8	96
							2A2	20 days	0.02	99.1
								72 days	0	99.2
