# Supplementary material for: Phenotypic plasticity underlies local invasion and distant metastasis in colon cancer
Source: eLife. 2021 May 26;10:e61461. doi: 10.7554/eLife.61461 (PMC8192123; doi:10.7554/eLife.61461)
Supplement: Figure 3—source data 1. — A total of 152 and 353 differentially regulated genes were identified between the CD44hiEpCAMhi and CD44hiEpCAMlo cells in HCT116 and SW480, respectively (p adjusted<0.01, when applying a log2 fold change of <–1.5 and > 1.5). [file elife-61461-fig3-data1.xlsx]

## Sheet: Blad1
Gene symbol	Description
ACOXL	acyl-CoA oxidase-like
AP1M2	adaptor-relator protein complex 1
BSPRY	B-box and SPRY domain containing
C1orf210	chromosome 1 open reading frame 210
CCDC64B	coiled-coil domain containing 64B
CDH1	cadherin 1, type 1
CDH3	cadherin 1, type 3
CLDN7	claudin 7
CNTNAP3	contactin associated protein family member 3
CNTNAP3B	contactin associated protein family member 3B
DACT1	dishevelled-binding antagonist of beta-catenin 1
EFNA5	ephrin-A5
EPCAM	epithelial cell adhesion molecule
EPHA1	EPH receptor A1
ESRP1	epithelial splicing regulatory protein 1
KDF1	keratinocyte differentiation factor 1
KLK10	kallikrein-related peptidase 10
LAD1	ladinin 1
LAMA3	laminin, alpha 3
LAMC2	laminin, gamma 2
MACC1	metastasis associated in colon cancer 1
MAL2	mal, T-cell differentiation protein 2 (gene/pseudogene)
MAP7	microtubule-associated protein 7
MARVELD3	MARVEL domain containing 3
NTNG2	netrin G2
PMEPA1	prostate transmembrane protein, androgen induced 1
RG55	regulator of G-protein signaling 5
SPARC	secreted protein acidic and rich in cysteine (osteonectin)
ST14	suppression of tumorigenicity 14
SUSD2	sushi domain containing 2
SYT11	synaptotagmin X!
TMC5	regulator of G-protein signaling 5
TMEM125	transmembrane protein 125
ZEB1	zinc finger E-box binding homeobox 1
