# Supplementary material for: Phenotypic plasticity underlies local invasion and distant metastasis in colon cancer
Source: eLife. 2021 May 26;10:e61461. doi: 10.7554/eLife.61461 (PMC8192123; doi:10.7554/eLife.61461)
Supplement: Figure 5—source data 1. [file elife-61461-fig5-data1.xlsx]

## Sheet: Signatures
EMT_Nanostring_Epi	EMT_Nanostring_Mes	CMS4_RF	CMS4_TC	Mes-like_Markers
AGR2	AKAP12	ACTA2	A4GALT	ABCC3
AP1M2	AKAP2	ADAM12	ABCC3	AC006262.5
ARHGAP32	AKT3	ADAMTS12	AC004951,6	ADAM9
BCAS1	ANGPTL2	AEBP1	AC006262,5	ADIRF
CBLC	ASPN	AKAP12	AGRN	AGRN
CD24	BGN	ANK2	AHNAK2	AHNAK
CD2AP	BICC1	ANTXR1	ALDH1A1	AHNAK2
CDH1	BNC2	AOC3	ANO1	ALDH1A1
CDS1	C1S	AQP1	ANXA1	ANO1
CEACAM1	CALD1	ARMCX1	APLP2	ANXA1
CEACAM5	CAV1	ASPN	APOL1	ANXA4
CEACAM6	CCL8	BGN	AQP1	APLP2
CKMT1A	CD163	BICC1	ASPHD1	APOL1
CLDN7	CDH11	BNC2	ATHL1	APP
CXADR	CDH2	BOC	BAIAP2	ARL6IP1
CYB561	CDK14	C1R	BAMBI	ASPHD1
ELF3	CEP170	C1S	BHLHE41	B2M
EPCAM	CHRDL1	C3	BMP4	BLVRB
EPN3	CLEC2B	CACNA2D1	C15ORF52	BMP4
EPS8L1	CLIC4	CALD1	C19ORF33	BST2
ERBB2	COL5A2	CCDC80	C19ORF60	C19orf33
ERBB3	COL6A1	CLDN11	C4ORF48	C4orf48
ESRP1	COL6A2	CNN1	C5ORF42	CALB1
F11R	CRISPLD2	COL14A1	C9ORF16	CAMK2N1
FAM174B	CSF2RB	COL15A1	C9ORF3	CAPG
FGFR3	CTSK	COL1A1	CAMK2N1	CCL26
FUT3	CXCL12	COL1A2	CD81	CD151
GALNT7	CXCL13	COL3A1	CD82	CD55
GDF15	CXCR4	COL5A1	CDA	CD59
GPR56	CYP1B1	COL5A2	CEACAM6	CD82
GRHL2	DCN	COL6A3	CLIC3	CDA
HDHD3	DDR2	COL8A1	CLSTN1	CDKN2A
IRF6	DPT	COL8A2	COL17A1	CEACAM5
KRT19	DPYSL3	COLEC12	COL1A1	CEACAM6
KRT7	ECM2	CRISPLD1	COL1A2	CHMP2A
LAD1	EMP3	CRYAB	COL3A1	CHPF
MUC1	ENPP2	CTSK	COL5A1	CLIC3
MYO5C	EVI2A	CXCL12	COL6A1	CLSTN1
OCLN	FAP	CYP1B1	CRABP2	COL17A1
OVOL2	FBLN1	DCLK1	CRIP1	COL1A1
PLS1	FBN1	DCN	CTSB	COL1A2
PPL	FERMT2	DDR2	CYP4F3	COL3A1
PRR15L	FGL2	DPT	DCBLD2	COL6A1
PRSS8	FHL1	DPYSL3	DDIT4	CRABP2
PTK6	FLI1	ECM2	DDX17	CRIP1
RAB25	FN1	EDNRA	DEFB1	CSTB
RBM47	FSTL1	EFEMP1	DMKN	CTSB
S100A14	FXYD6	FBLN1	DOCK5	CTSD
SCNN1A	GIMAP4	FBN1	DUSP27	CYP4F3
SDC4	GIMAP6	FBXO32	EHF	DDX17
SH3YL1	GLYR1	FERMT2	ELF3	DEFB1
SLC44A4	GREM1	FIBIN	ENO2	DUOX2
SORD	GZMK	FLNA	EPHA2	DUOXA2
SPDEF	HEG1	FN1	EPHB3	ECM1
SPINT1	IGF1	FNDC1	EPS8L1	EPS8L1
ST14	IL10RA	FSTL1	ERBB2	ERO1A
TJP2	ISLR	FXYD6	ERBB2IP	F3
TJP3	ITM2A	GEM	F3	FAM3C
TMEM30B	JAM2	GLT8D2	FAM3C	FXYD5
TMPRSS2	JAM3	GPC6	FAM83A	GABRP
TMPRSS4	KCNJ8	GREM1	FKBP10	GCNT3
TOM1L1	KIAA1462	GUCY1A3	GABRP	GPRC5A
TSPAN1	LHFP	GUCY1B3	GCNT3	GPRC5C
VAMP8	LOX	HDGFRP3	GPRC5A	GRN
VAV3	LY96	HMCN1	HSPA1A	HSPA1A
	MAF	HOPX	HSPG2	HSPB1
	MEOX2	HSD17B6	IER5L	HSPG2
	MFAP4	HSPB8	IGFBP3	IFI27
	MMP2	HTR2B	IGFBP4	IFI6
	MPDZ	IGFBP5	IGFBP6	IFITM2
	MRC1	INHBA	IGHG1	IFT172
	MS4A4A	ISLR	IGHG3	IGFBP3
	MS4A6A	KCTD12	IGHG4	IGFBP4
	MYLK	LBH	IGKC	IGFBP6
	NAP1L3	LHFP	IGLC2	IGHG3
	NR3C1	LMOD1	ITGA3	IGHG4
	OLFML2B	LOX	ITGB1	ITGA3
	PCOLCE	LUM	ITGB4	ITGB1
	PDGFC	MAP1B	ITGB5	ITGB4
	PLEKHO1	MEIS1	JUP	ITM2B
	PLXNC1	MFAP2	KCP	JUP
	PMP22	MGP	KLK11	KLK10
	PTGDS	MIR100HG	KLK6	KLK11
	PTGIS	MMP2	KLK7	KLK6
	PTPRC	MN1	KLK8	KLK7
	PTRF	MOXD1	KRT16	KLK8
	PTX3	MRGPRF	KRT19	KRT16
	QKI	MSRB3	KRT80	KRT17
	RUNX1T1	MXRA5	LCN2	KRT19
	SACS	MYL9	LIF	KRT6A
	SAMSN1	MYLK	LINC00969	KRT6B
	SERPINF1	NAP1L3	LUM	KRT7
	SERPING1	NDN	LYZ	LAMB3
	SFRP1	NEXN	MBOAT2	LAPTM4A
	SLIT2	PCDH7	MIA	LCN2
	SNAI2	PCOLCE	MMP1	LEMD1
	SPARC	PDE1A	MMP7	LGALS1
	SPARCL1	PDGFC	MRPL33	LINC00969
	SRGN	PDLIM3	MRPS21	LMO7
	SYNE1	PEG3	MT1E	LPCAT4
	TCF4	PHLDB2	MT1X	LSR
	TNC	PLN	MT2A	LY6E
	TNS1	PPP1R3C	MT-CO1	LYZ
	TPM2	PRELP	MT-ND1	MIA
	TWIST1	PRICKLE1	MT-ND2	MMP1
	VCAM1	PTGIS	MUC16	MMP7
	VCAN	RAB31	MZT2B	MRPL33
	VIM	RARRES2	NBL1	MRPS21
	VSIG4	RBMS1	NDRG2	MSLN
	WIPF1	RBMS3	NEAT1	MT1E
	WWTR1	RUNX1T1	NMU	MT1X
	ZCCHC24	S1PR3	NOTCH3	MT2A
	ZEB1	SDC2	NRP2	MT-ND3
	ZEB2	SERPINF1	ONECUT3	MUC1
	ZFPM2	SERPING1	OST4	MUC13
		SFRP2	PADI1	MUC5B
		SFRP4	PFDN5	MX1
		SGCE	PGM2L1	MYOF
		SLIT2	PHLDA3	NBL1
		SNAI2	PLA2G16	NDUFB1
		SPARCL1	PLTP	NEAT1
		SPOCK1	PLXNB2	NMU
		SSPN	PMEPA1	OST4
		STON1	POLR2J3	PADI1
		SULF1	PPP1CB	PDZK1IP1
		TAGLN	PPP3CA	PHGR1
		TCEAL7	PROM2	PI3
		TGFB1I1	PRSS8	PLA2G2A
		THBS1	PSAP	PLAC8
		THBS2	PSCA	PLXNB2
		THY1	PTPRF	POLR2J3
		TIMP2	PVRL4	PPP1CB
		TIMP3	RBMS1	PPP3CA
		TMEM47	RBP1	PRKCDBP
		TNC	RGS10	PRSS8
		TNS1	RICTOR	PSAP
		TPM2	RIPK4	PSCA
		VCAN	RP1-122P22,4	PTPRF
		WISP1	RP11-551L14,4	PTTG1IP
		WWTR1	RUNX3	PYCARD
		ZCCHC24	S100A13	QSOX1
		ZFPM2	S100A2	RABAC1
		ZNF521	S100A4	RAMP1
			SDC1	RARRES1
			SELM	RARRES3
			SEMA3B	RHOC
			SEZ6L2	RIOK3
			SFTA2	RNASE1
			SIPA1	RP1-122P22.4
			SLC2A1	S100A11
			SLC38A5	S100A13
			SNHG18	S100A14
			SPARC	S100A16
			SPON1	S100A2
			SPON2	S100A4
			ST3GAL1	S100A6
			TACSTD2	SDC1
			TAGLN	SEC62
			TFF2	SELM
			TIMP2	SEMA3B
			TM4SF4	SERPINB3
			TMEM219	SERPINB5
			TNNI3	SEZ6L2
			TNNT1	SFTA2
			TPM2	SH3BGRL3
			TRIM29	SLC2A1
			TRIM54	SLC5A3
			TSPO	SLPI
			UNC13D	SPARC
			UNC5B-AS1	SPINT2
			UNC93B1	SPON1
			VMP1	SPON2
			WFS1	SPP1
			XIST	SPRR3
			YPEL3	SYNGR2
			ZFP36L1	TACSTD2
				TAGLN2
				TFF1
				TFF2
				TIMP1
				TIMP2
				TM4SF4
				TMBIM1
				TMBIM6
				TMEM219
				TMEM59
				TNNT1
				TRIM29
				TRIM54
				TSPAN1
				TSPO
				TXNIP
				TYMP
				UNC5B-AS1
				UNC93B1
				VAMP8
				VMP1
				WFDC2
				XIST
				ZFP36L1
